# Supplementary material
Source: PubMed Central journal article supplement (PMC4875095)

## SUPPLEMENTARY DATA

Figure S1. The SA-OMIT map of the hinge loop region with a 1.8 sigma cutoff for one DSD subunit in AO-M<sup>pro</sup>. The two protomers in the DSD are colored in green and yellow, respectively.

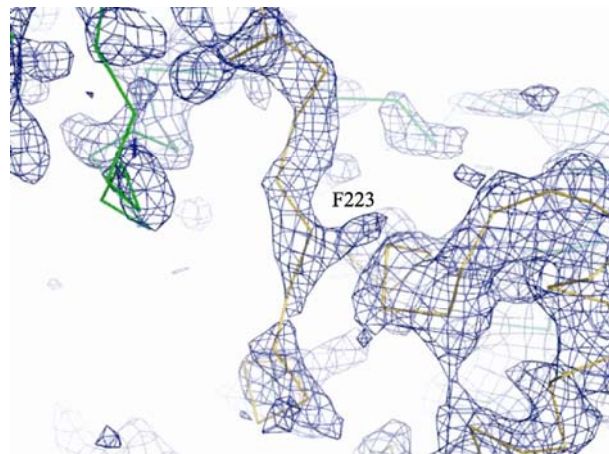

Supplement: 13238_2010_44_MOESM1_ESM.pdf [file 13238_2010_44_MOESM1_ESM.pdf]
